# Supplementary material for: Altered serum metabolome associated with vascular calcification developed from CKD and the critical pathways
Source: Front Cardiovasc Med. 2023 Apr 11;10:1114528. doi: 10.3389/fcvm.2023.1114528 (PMC10126378; doi:10.3389/fcvm.2023.1114528)
Supplement: Supplementary file 6 [file Table6.xlsx]

## Sheet: Sheet1
Pathway	Total	Hits	Raw p	-ln(p)	Holm adjust	FDR	Impact	Hits Cpd	Total Cpd
Steroid hormone biosynthesis	70	2	0.022286	3.8038	1	1	0.02775	Dehydroepiandrosterone cpd:C01227; Estrone sulfate cpd:C02538	Cholesterol cpd:C00187; 20a,22b-Dihydroxycholesterol cpd:C05501; 20 alpha-Hydroxycholesterol cpd:C05500; 17a,20a-Dihydroxycholesterol cpd:C05499; Pregnenolone cpd:C01953; 21-Hydroxypregnenolone cpd:C05485; 17a-Hydroxypregnenolone cpd:C05138; 17a,21-Dihydroxypreg-nenolone cpd:C05487; 11b,17a,21-Trihydroxypreg-nenolone cpd:C05489; Dehydroepiandrosterone cpd:C01227; DHEA sulfate cpd:C04555; 16a-Hydr…
Valine, leucine and isoleucine biosynthesis	11	1	0.038673	3.2526	1	1	0	Alpha-ketoisovaleric acid cpd:C00141	3-Methyl-2-oxovaleric acid cpd:C00671; L-Leucine cpd:C00123; L-Valine cpd:C00183; Alpha-ketoisovaleric acid cpd:C00141; L-Isoleucine cpd:C00407; Pyruvic acid cpd:C00022; L-Leucyl-tRNA cpd:C02047; 4-Methyl-2-oxopentanoate cpd:C00233; L-Valyl-tRNA(Val) cpd:C02554; L-Isoleucyl-tRNA(Ile) cpd:C03127; 2-(a-Hydroxyethyl)thiamine diphosphate cpd:C05125
Pantothenate and CoA biosynthesis	15	1	0.052436	2.9482	1	1	0	Alpha-ketoisovaleric acid cpd:C00141	Dephospho-CoA cpd:C00882; Pantetheine 4'-phosphate cpd:C01134; Pantetheine cpd:C00831; 4-Phosphopantothenoylcysteine cpd:C04352; D-Pantothenoyl-L-cysteine cpd:C04079; D-4'-Phosphopantothenate cpd:C03492; L-Cysteine cpd:C00097; Pantothenic acid cpd:C00864; Ureidopropionic acid cpd:C02642; Dihydrouracil cpd:C00429; L-Valine cpd:C00183; Coenzyme A cpd:C00010; Beta-Alanine cpd:C00099; Uracil cpd:C001…
Amino sugar and nucleotide sugar metabolism	37	1	0.12534	2.0767	1	1	0.06921	N-Acetyl-D-glucosamine cpd:C00140	N-Acetyl-D-glucosamine cpd:C00140; N-Acetyl-D-Glucosamine 6-Phosphate cpd:C00357; N-Acetyl-alpha-D-glucosamine 1-phosphate cpd:C04501; Uridine diphosphate-N-acetylglucosamine cpd:C00043; N-Acetylmannosamine cpd:C00645; N-Acetylneuraminic acid 9-phosphate cpd:C06241; N-Acetylneuraminic acid cpd:C00270; Galactose 1-phosphate cpd:C00446; Uridine diphosphate glucose cpd:C00029; Glucose 1-phosphate cp…
Valine, leucine and isoleucine degradation	38	1	0.12854	2.0515	1	1	0.0119	Alpha-ketoisovaleric acid cpd:C00141	Enzyme N6-(lipoyl)lysine cpd:C15972; 2-Methyl-1-hydroxybutyl-ThPP cpd:C15978; Enzyme N6-(dihydrolipoyl)lysine cpd:C15973; 2-Methyl-1-hydroxypropyl-ThPP cpd:C15976; 3-Methyl-1-hydroxybutyl-ThPP cpd:C15974; Acetyl-CoA cpd:C00024; Acetoacetyl-CoA cpd:C00332; Acetoacetic acid cpd:C00164; 3-Hydroxy-3-methylglutaryl-CoA cpd:C00356; 3-Methylcrotonyl-CoA cpd:C03069; 3-Hydroxyisovaleryl-CoA cpd:C05998; Is…
TableS 6: Parameters of pathway analysis (non-VC group vs.VC group). Pathway: name of the pathway in KEGG database; Total: number of metabolites in the pathway; Hits: number of differential metabolites hitting the pathway; Raw p: p value of enrichment analysis; -ln(p): the negative logarithm of P with e as the base (negative natural base logarithm); Holm adjust: p value corrected by multiple hypo…
